# Supplementary material for: Novel Gene Polymorphisms for Stable Warfarin Dose in a Korean Population: Genome-Wide Association Study
Source: MDPI journal article supplement (doi:10.3390/biomedicines11082308), 2023-08-19
Supplement: s1 [file s1]

# Supplementary Materials

**Table S1.** Single nucleotide polymorphisms reached genome significance at  $p$  value  $< 5 \times 10^{-7}$ .

| CHR | Position | $\beta$ | SE     | R2     | T     | $p$                    | Gene                  | rsID       |
|-----|----------|---------|--------|--------|-------|------------------------|-----------------------|------------|
| 16  | 31104878 | 2.341   | 0.2319 | 0.3257 | 10.09 | $8.41 \times 10^{-20}$ | <i>VKORC1</i>         | rs9934438  |
| 16  | 30947572 | 2.402   | 0.2449 | 0.3131 | 9.806 | $6.05 \times 10^{-19}$ | <i>FBXL19</i>         | rs7200879  |
| 16  | 31137712 | 2.335   | 0.2384 | 0.3125 | 9.794 | $6.57 \times 10^{-19}$ | <i>KAT8</i>           | rs889548   |
| 16  | 31075175 | 2.203   | 0.2279 | 0.3079 | 9.665 | $1.62 \times 10^{-18}$ | <i>ZNF668</i>         | rs2303223  |
| 16  | 31011183 | 2.198   | 0.2291 | 0.3028 | 9.595 | $2.46 \times 10^{-18}$ | <i>STX1B</i>          | rs4889606  |
| 16  | 31014179 | 2.181   | 0.2283 | 0.301  | 9.555 | $3.23 \times 10^{-18}$ | <i>STX1B</i>          | rs9926533  |
| 16  | 31048079 | 2.181   | 0.2283 | 0.301  | 9.555 | $3.23 \times 10^{-18}$ | <i>VKORC1</i>         | rs10871454 |
| 16  | 31054040 | 2.181   | 0.2283 | 0.301  | 9.555 | $3.23 \times 10^{-18}$ | <i>STX4</i>           | rs2288004  |
| 16  | 31088347 | 2.181   | 0.2283 | 0.301  | 9.555 | $3.23 \times 10^{-18}$ | <i>VKORC1</i>         | rs749671   |
| 16  | 31088625 | 2.181   | 0.2283 | 0.301  | 9.555 | $3.23 \times 10^{-18}$ | <i>ZNF646</i>         | rs749670   |
| 16  | 31103796 | 2.181   | 0.2283 | 0.301  | 9.555 | $3.23 \times 10^{-18}$ | <i>VKORC1</i>         | rs2359612  |
| 16  | 31104509 | 2.181   | 0.2283 | 0.301  | 9.555 | $3.23 \times 10^{-18}$ | <i>VKORC1</i>         | rs8050894  |
| 16  | 31107689 | 2.181   | 0.2283 | 0.301  | 9.555 | $3.23 \times 10^{-18}$ | <i>BCKDK</i>          | rs9923231  |
| 16  | 31117413 | 2.181   | 0.2283 | 0.301  | 9.555 | $3.23 \times 10^{-18}$ | <i>BCKDK</i>          | rs2032915  |
| 16  | 31044683 | 2.211   | 0.2313 | 0.3042 | 9.559 | $3.44 \times 10^{-18}$ | <i>STX4</i>           | rs58726213 |
| 16  | 31037020 | 2.181   | 0.2289 | 0.3007 | 9.525 | $4.07 \times 10^{-18}$ | <i>STX4</i>           | rs11150604 |
| 16  | 31049155 | 2.176   | 0.2301 | 0.2966 | 9.455 | $6.32 \times 10^{-18}$ | <i>STX4</i>           | rs55979739 |
| 16  | 31050023 | 2.176   | 0.2301 | 0.2966 | 9.455 | $6.32 \times 10^{-18}$ | <i>STX4</i>           | ---        |
| 16  | 31050033 | 2.176   | 0.2301 | 0.2966 | 9.455 | $6.32 \times 10^{-18}$ | <i>STX4</i>           | ---        |
| 16  | 31056433 | 2.176   | 0.2301 | 0.2966 | 9.455 | $6.32 \times 10^{-18}$ | <i>ZNF668</i>         | rs35468353 |
| 16  | 31092075 | 2.176   | 0.2301 | 0.2966 | 9.455 | $6.32 \times 10^{-18}$ | <i>ZNF646</i>         | rs7196726  |
| 16  | 31096876 | 2.176   | 0.2301 | 0.2966 | 9.455 | $6.32 \times 10^{-18}$ | <i>PRSS53</i>         | rs4468641  |
| 16  | 31102321 | 2.176   | 0.2301 | 0.2966 | 9.455 | $6.32 \times 10^{-18}$ | <i>VKORC1</i>         | rs7294     |
| 16  | 31121793 | 2.15    | 0.2281 | 0.2954 | 9.429 | $7.54 \times 10^{-18}$ | <i>BCKDK</i>          | rs14235    |
| 16  | 31124407 | 2.15    | 0.2281 | 0.2954 | 9.429 | $7.54 \times 10^{-18}$ | <i>KAT8</i>           | rs749767   |
| 16  | 31129895 | 2.15    | 0.2281 | 0.2954 | 9.429 | $7.54 \times 10^{-18}$ | <i>KAT8</i>           | rs9925964  |
| 16  | 31129942 | 2.15    | 0.2281 | 0.2954 | 9.429 | $7.54 \times 10^{-18}$ | <i>KAT8</i>           | rs1978487  |
| 16  | 31131614 | 2.15    | 0.2281 | 0.2954 | 9.429 | $7.54 \times 10^{-18}$ | <i>KAT8</i>           | rs4527034  |
| 16  | 31145219 | 2.15    | 0.2281 | 0.2954 | 9.429 | $7.54 \times 10^{-18}$ | <i>PRSS8</i>          | rs12597511 |
| 16  | 31054607 | 2.173   | 0.2307 | 0.2959 | 9.417 | $8.38 \times 10^{-18}$ | <i>ZNF668</i>         | rs1108431  |
| 16  | 31095171 | 2.232   | 0.2376 | 0.2949 | 9.394 | $9.79 \times 10^{-18}$ | <i>POL3S</i>          | rs11865038 |
| 16  | 31093954 | 2.172   | 0.2314 | 0.2956 | 9.388 | $1.05 \times 10^{-17}$ | <i>ZNF646</i>         | rs750952   |
| 16  | 30918487 | 2.224   | 0.2384 | 0.2912 | 9.332 | $1.44 \times 10^{-17}$ | <i>CTF1</i>           | rs11649653 |
| 16  | 30948397 | 2.224   | 0.2384 | 0.2912 | 9.332 | $1.44 \times 10^{-17}$ | <i>FBXL19</i>         | rs12917722 |
| 16  | 31132250 | 2.144   | 0.2299 | 0.291  | 9.328 | $1.48 \times 10^{-17}$ | <i>KAT8</i>           | rs11865499 |
| 16  | 31133449 | 2.144   | 0.2299 | 0.291  | 9.328 | $1.48 \times 10^{-17}$ | <i>KAT8</i>           | rs1060506  |
| 16  | 30995669 | 2.25    | 0.2419 | 0.2908 | 9.301 | $1.82 \times 10^{-17}$ | <i>SETD1A</i>         | rs6950     |
| 16  | 30928970 | 2.22    | 0.2404 | 0.2869 | 9.236 | $2.74 \times 10^{-17}$ | <i>FBXL19, PRSS53</i> | rs12924903 |
| 16  | 30936081 | 2.22    | 0.2404 | 0.2869 | 9.236 | $2.74 \times 10^{-17}$ | <i>FBXL19</i>         | rs35675346 |
| 16  | 30999142 | 2.22    | 0.2404 | 0.2869 | 9.236 | $2.74 \times 10^{-17}$ | <i>HSD3B7</i>         | rs9938550  |
| 16  | 31002664 | 2.22    | 0.2404 | 0.2869 | 9.236 | $2.74 \times 10^{-17}$ | <i>STX1B</i>          | rs8062719  |
| 16  | 30970941 | 2.251   | 0.2438 | 0.2879 | 9.236 | $2.80 \times 10^{-17}$ | <i>SETD1A</i>         | rs1870293  |
| 16  | 30942625 | 2.222   | 0.2411 | 0.2869 | 9.213 | $3.27 \times 10^{-17}$ | <i>FBXL19, STX1B</i>  | rs10782001 |
| 16  | 30982225 | 2.19    | 0.238  | 0.2853 | 9.199 | $3.50 \times 10^{-17}$ | <i>SETD1A</i>         | rs4889603  |
| 16  | 30862135 | 2.462   | 0.2733 | 0.2769 | 9.01  | $1.22 \times 10^{-16}$ | <i>BCL7C</i>          | rs4889614  |
| 16  | 30865440 | 2.462   | 0.2733 | 0.2769 | 9.01  | $1.22 \times 10^{-16}$ | <i>BCL7C</i>          | rs4889534  |

|    |          |       |        |        |       |                        |                                |             |
|----|----------|-------|--------|--------|-------|------------------------|--------------------------------|-------------|
| 16 | 30872471 | 2.462 | 0.2733 | 0.2769 | 9.01  | $1.22 \times 10^{-16}$ | <i>BCL7C</i>                   | rs11647697  |
| 16 | 30878863 | 2.462 | 0.2733 | 0.2769 | 9.01  | $1.22 \times 10^{-16}$ | <i>BCL7C</i>                   | rs4889634   |
| 16 | 30881299 | 2.462 | 0.2733 | 0.2769 | 9.01  | $1.22 \times 10^{-16}$ | <i>BCL7C</i>                   | rs12920259  |
| 16 | 30979818 | 2.162 | 0.2421 | 0.279  | 8.929 | $2.40 \times 10^{-16}$ | <i>SETD1A</i>                  | ---         |
| 16 | 30888295 | 2.422 | 0.2719 | 0.2722 | 8.905 | $2.44 \times 10^{-16}$ | <i>LOC101928736</i>            | rs67456613  |
| 16 | 30890538 | 2.422 | 0.2719 | 0.2722 | 8.905 | $2.44 \times 10^{-16}$ | <i>LOC101928736</i>            | rs12926295  |
| 16 | 30897456 | 2.41  | 0.2716 | 0.2716 | 8.87  | $3.13 \times 10^{-16}$ | <i>BCL7C</i>                   | rs11150599  |
| 16 | 31141993 | 2.075 | 0.2351 | 0.2696 | 8.825 | $4.23 \times 10^{-16}$ | <i>KAT8</i>                    | rs1549293   |
| 16 | 30833321 | 2.423 | 0.2781 | 0.2637 | 8.713 | $8.56 \times 10^{-16}$ | <i>ZNF629</i>                  | rs8046001   |
| 16 | 30837596 | 2.423 | 0.2781 | 0.2637 | 8.713 | $8.56 \times 10^{-16}$ | <i>ZNF629</i>                  | rs12926237  |
| 16 | 30895545 | 2.46  | 0.2841 | 0.2613 | 8.659 | $1.22 \times 10^{-15}$ | <i>LOC101928736</i>            | rs4889651   |
| 16 | 30739919 | 2.385 | 0.2801 | 0.2557 | 8.515 | $3.14 \times 10^{-15}$ | <i>SRCAP</i>                   | rs2289442   |
| 16 | 31016970 | 2.114 | 0.2509 | 0.2508 | 8.424 | $5.52 \times 10^{-15}$ | <i>STX1B</i>                   | rs729482    |
| 16 | 31026427 | 2.114 | 0.2509 | 0.2508 | 8.424 | $5.52 \times 10^{-15}$ | <i>STX1B, STX4,<br/>ZNF668</i> | rs4889609   |
| 16 | 31026427 | 2.114 | 0.2509 | 0.2508 | 8.424 | $5.52 \times 10^{-15}$ | <i>STX1B, STX4,<br/>ZNF668</i> | rs4889609   |
| 16 | 31022639 | 2.114 | 0.2517 | 0.2505 | 8.399 | $6.61 \times 10^{-15}$ | <i>STX4</i>                    | rs72800847  |
| 16 | 30833246 | 2.32  | 0.2791 | 0.2458 | 8.313 | $1.12 \times 10^{-14}$ | <i>ZNF629</i>                  | rs9319587   |
| 16 | 30672719 | 2.239 | 0.2697 | 0.2453 | 8.302 | $1.20 \times 10^{-14}$ | <i>FBRS</i>                    | rs885107    |
| 16 | 30703155 | 2.239 | 0.2697 | 0.2453 | 8.302 | $1.20 \times 10^{-14}$ | <i>LOC730183</i>               | rs7187359   |
| 16 | 30804257 | 2.239 | 0.2697 | 0.2453 | 8.302 | $1.20 \times 10^{-14}$ | <i>ZNF629</i>                  | rs12447534  |
| 16 | 30822409 | 2.239 | 0.2697 | 0.2453 | 8.302 | $1.20 \times 10^{-14}$ | <i>ZNF629</i>                  | rs13337900  |
| 16 | 30823047 | 2.239 | 0.2697 | 0.2453 | 8.302 | $1.20 \times 10^{-14}$ | <i>ZNF629</i>                  | rs4889490   |
| 16 | 30635659 | 2.104 | 0.2649 | 0.2294 | 7.944 | $1.13 \times 10^{-13}$ | <i>PRR14</i>                   | rs7186852   |
| 16 | 30642867 | 2.104 | 0.2649 | 0.2294 | 7.944 | $1.13 \times 10^{-13}$ | <i>PRR14</i>                   | rs7197475   |
| 16 | 31154358 | 1.885 | 0.2543 | 0.2058 | 7.412 | $2.93 \times 10^{-12}$ | <i>PRSS36</i>                  | rs78924645  |
| 16 | 31099011 | 1.347 | 0.2113 | 0.1608 | 6.374 | $1.13 \times 10^{-9}$  | <i>PRSS53</i>                  | rs11150606  |
| 16 | 30554159 | 1.417 | 0.2294 | 0.1525 | 6.175 | $3.32 \times 10^{-9}$  | <i>ZNF747</i>                  | rs8050463   |
| 1  | 1.47E+08 | 6.396 | 1.037  | 0.152  | 6.165 | $3.51 \times 10^{-9}$  | <i>ACP6</i>                    | rs140111718 |
| 16 | 31166028 | 1.54  | 0.2616 | 0.1411 | 5.887 | $1.53 \times 10^{-8}$  | <i>FUS</i>                     | rs12102776  |
| 16 | 31004812 | 2.254 | 0.4039 | 0.1297 | 5.581 | $7.36 \times 10^{-8}$  | <i>PRSS53, FBXL19</i>          | rs12445568  |
| 18 | 77294324 | 6.967 | 1.291  | 0.1208 | 5.397 | $1.81 \times 10^{-7}$  | <i>CTDP1</i>                   | rs190498759 |
| 8  | 23618463 | 3.477 | 0.6578 | 0.1169 | 5.286 | $3.11 \times 10^{-7}$  | <i>NKX2-6</i>                  | rs310279    |
| 9  | 38643996 | 3.651 | 0.6968 | 0.1151 | 5.239 | $3.89 \times 10^{-7}$  | <i>FAM201A</i>                 | rs1890109   |
| 4  | 78991190 | 4.304 | 0.8258 | 0.114  | 5.212 | $4.45 \times 10^{-7}$  | <i>FRAS1</i>                   | rs4386623   |
